# Supplementary material for: Uncovering complex microbiome activities via metatranscriptomics during 24 hours of oral biofilm assembly and maturation
Source: PubMed Central journal article supplement (PMC6284299; doi:10.1186/s40168-018-0591-4), 2018-12-06
Supplement: 40168_2018_591_MOESM2_ESM.pdf [file 40168_2018_591_MOESM2_ESM.pdf]

A

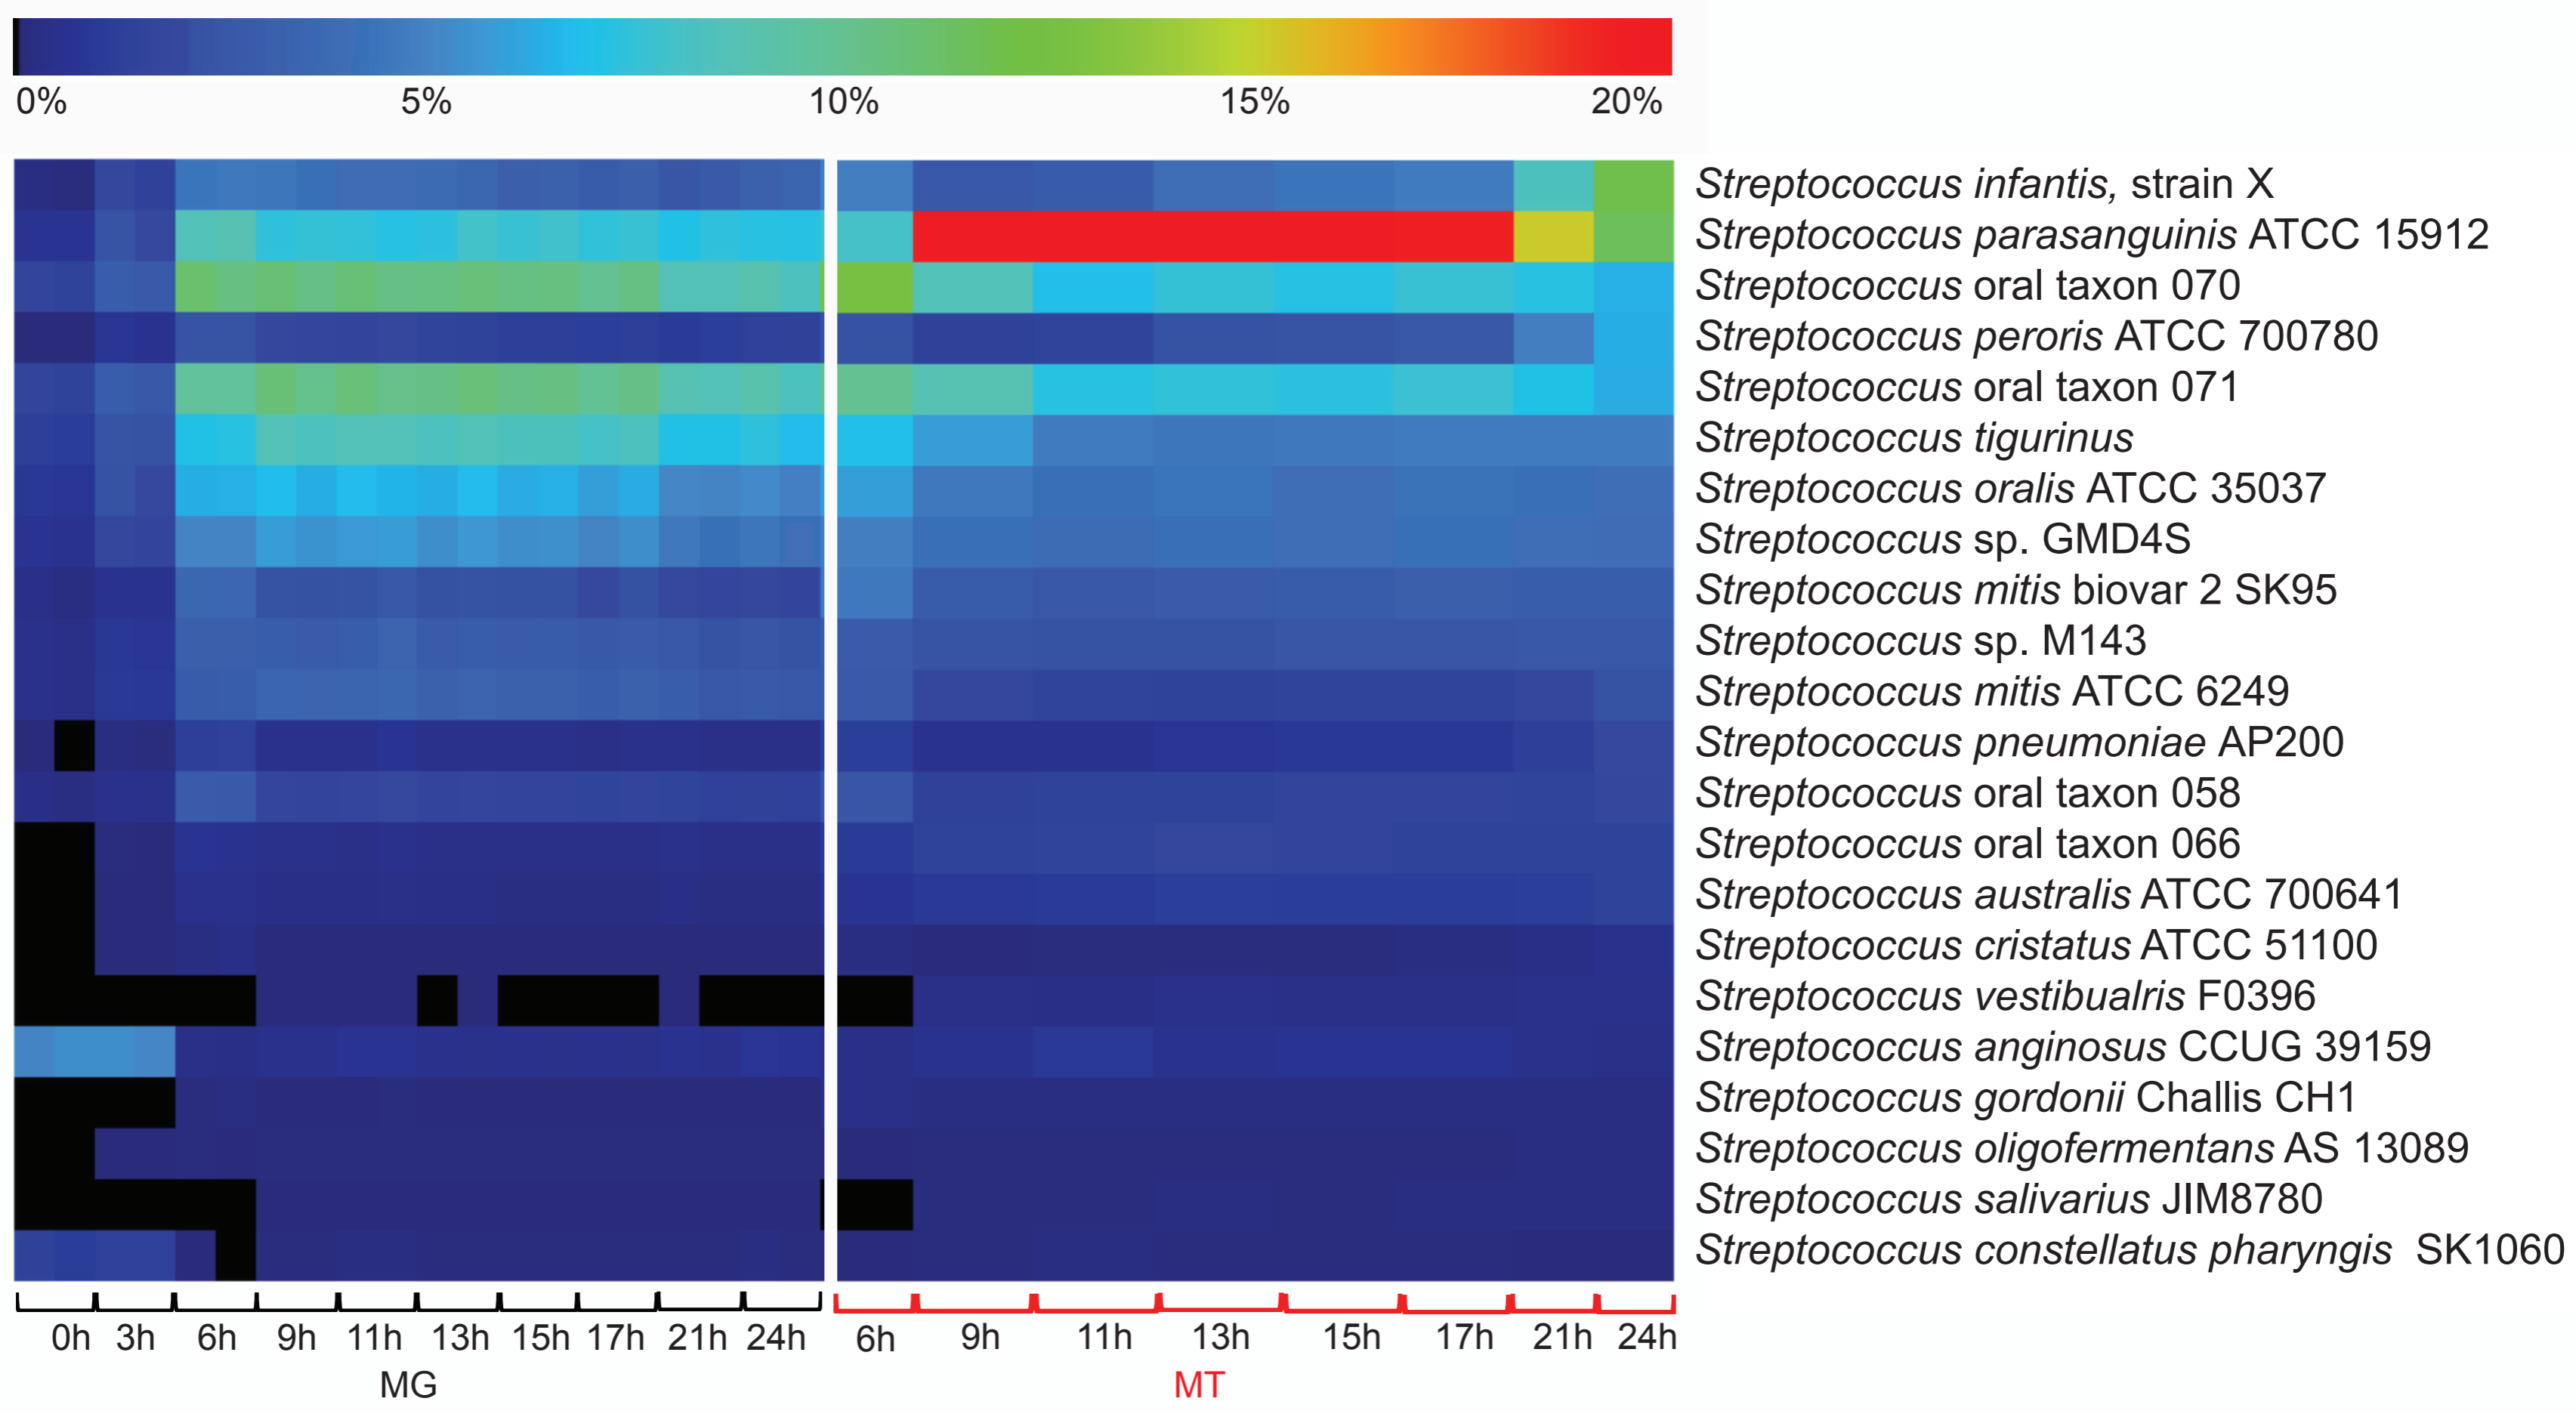

B

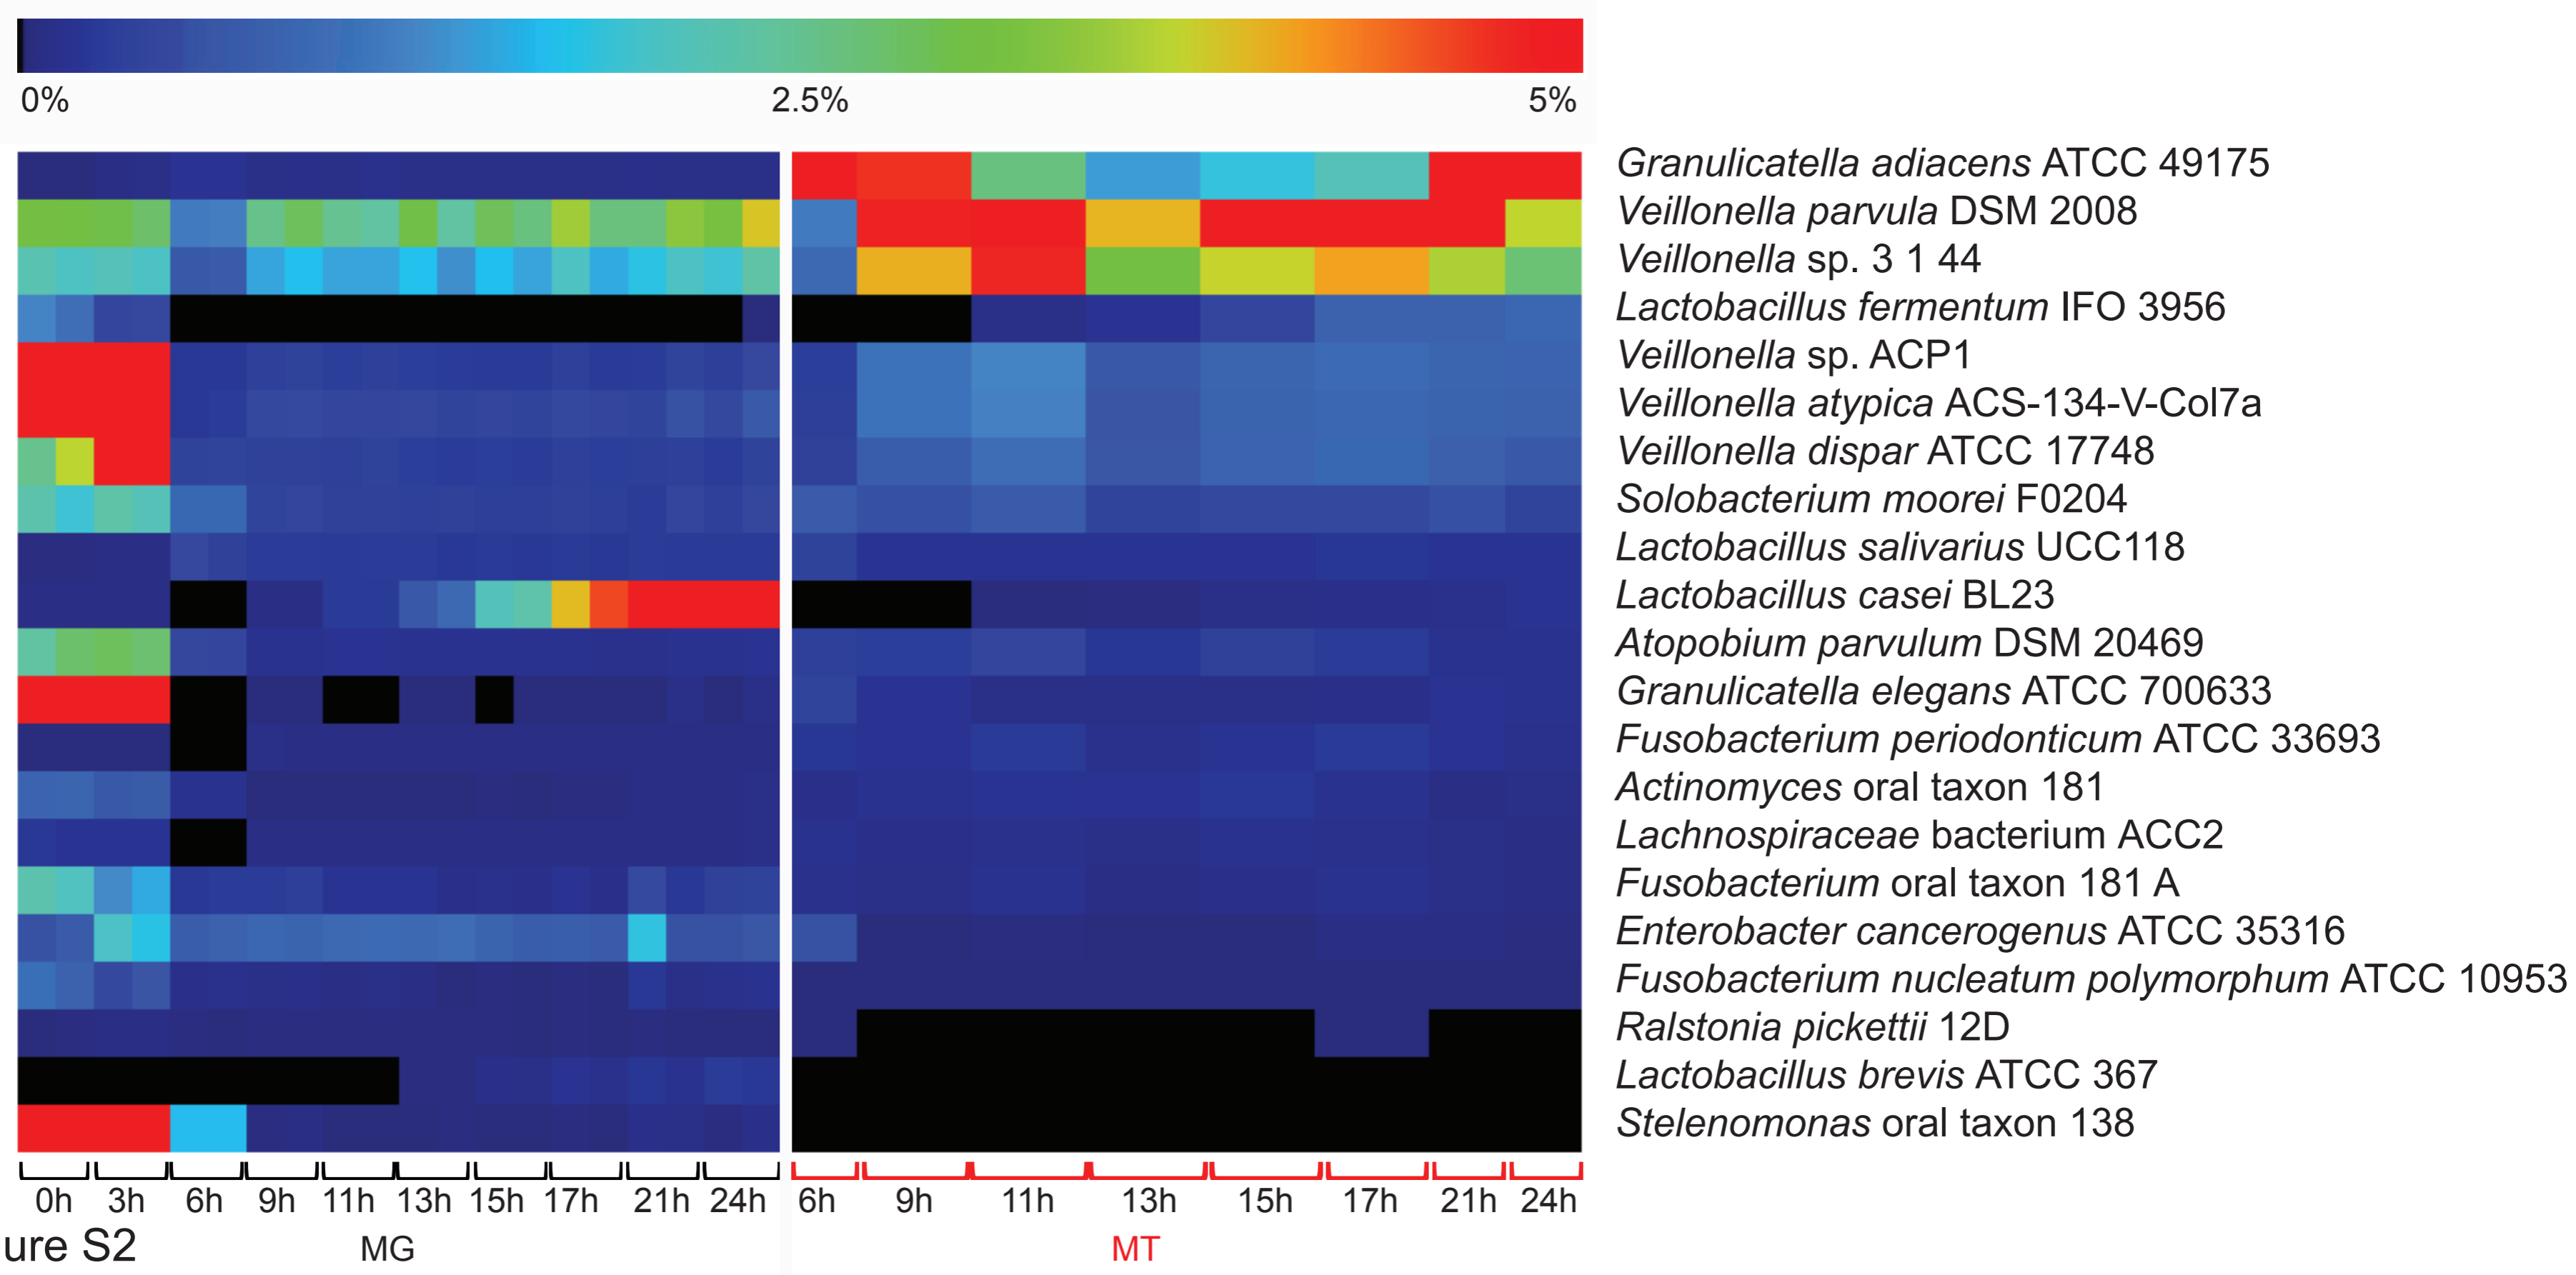

Figure S2
