# Supplementary material for: Uncovering complex microbiome activities via metatranscriptomics during 24 hours of oral biofilm assembly and maturation
Source: PubMed Central journal article supplement (PMC6284299; doi:10.1186/s40168-018-0591-4), 2018-12-06
Supplement: 40168_2018_591_MOESM18_ESM.pdf [file 40168_2018_591_MOESM18_ESM.pdf]

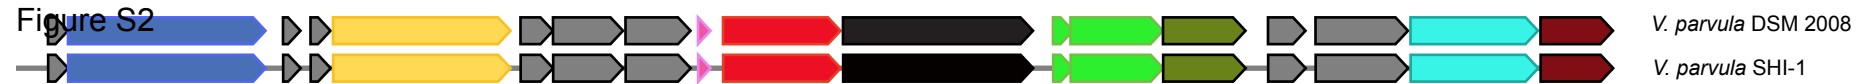

Ferrous iron transporter    Cation transporter    Six-cysteine peptide    SCIFF    Radical SAM    NiFe Hydrogenase maturation protein    Hydrogenase assembly protein

Hydrogenase expression protein    Organic solvent tolerance protein    UTP--glucose-1-phosphate uridylyltransferase    Hypothetical
